# Supplementary figures and images for: Multi-omics Characterization of Response to PD-1 Inhibitors in Advanced Melanoma
Source: MDPI journal article supplement (doi:10.3390/cancers15174407), 2023-09-03

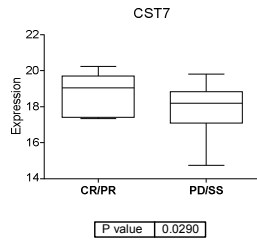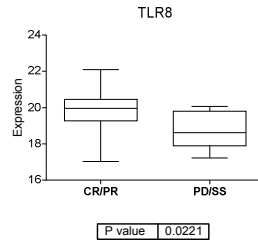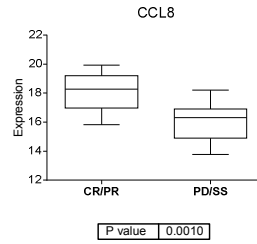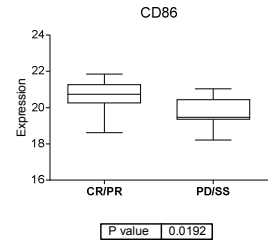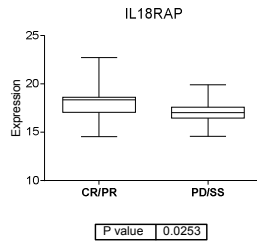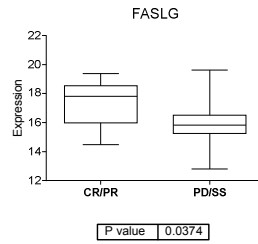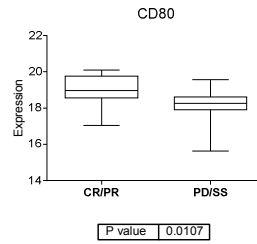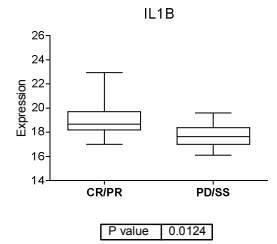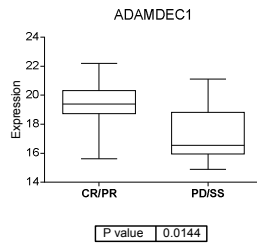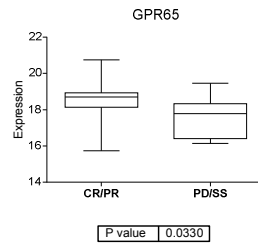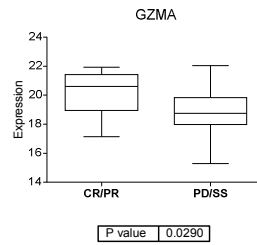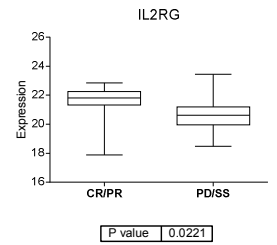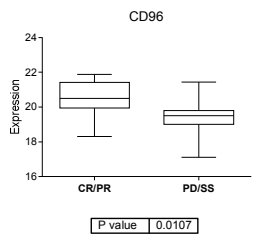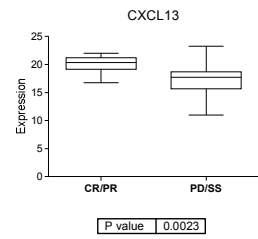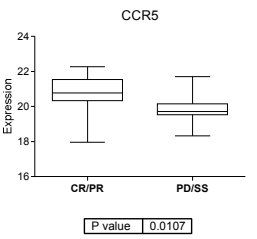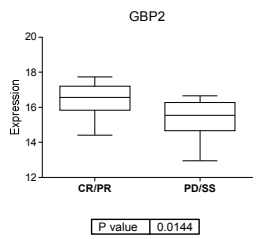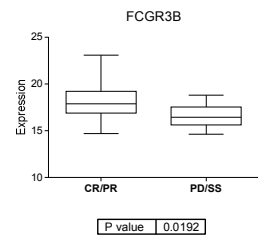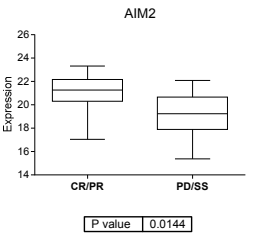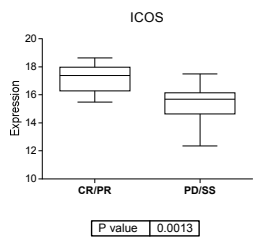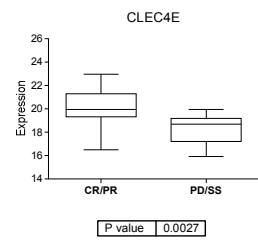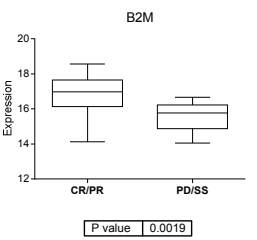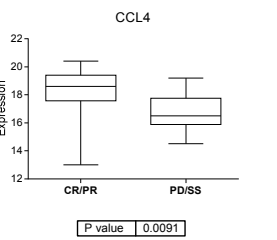

Supplement: s1 [file s1]
